# Supplementary material
Source: Research Square preprint supplement (doi:10.21203/rs.3.rs-8914790/v1)
Supplement: Supplementary file 1 [file fd66cfc09dd4ac355d9e8357.docx]

**Semi-structured Interview Guide**

**Introduction/warm-up statements**

First of all, we would like to thank you for your participation in our study and your acceptance to participate in the interview. In our interview, we will discuss your views and experiences regarding the motivators and barriers to nursing documentation practices of nurses.

As you know, nurses are responsible for delivering quality nursing care and documenting different activities. In addition, nursing documentation is the primary source of clinical information with multiple importance to different parties included in the care process. In this interview, we would like to hear your thoughts on nursing documentation practices and your views and experiences regarding your nursing documentation practices as a nurse.

Due to the scope of the study, all the ideas and opinions you express in the interview we will conduct with you will be very important and valuable in terms of the study findings. Although there is no right or wrong answer to the questions that we are going to ask you, we are interested in your views. Therefore, all your views and experiences, whether positive or negative, are important for the study. Please feel free to express your views that you oppose.

With your permission, we will record the interview that we are going to conduct vocally. All recordings will be used only for research purposes, it will be securely protected, and your name will not be mentioned at any stage of the research. If you do not understand something, you can easily ask your question. Please do not hesitate to ask any questionsand concerns that you may have.

Shall we start now?

**General questions**

- Would you please tell us your age in years: _____________
- Gender: Male / Female
- Would you please tell us your educational level (qualification): ______________
- Current working department/unit: ____________
- Would you please tell us your clinical work experiences (years): ____________
- Work Experience at Hiwot Fana Comprehensive Specialized Hospital: ________

**Presenting the main concepts**

- How do you describe what nursing documentation means to you?
- How do you usually document patient care during your shift?
- What kinds of information do you usually record?

**Probes:** Timing and how frequently you document, Hard copy/paper vs. electronic records (digital) (if applicable), any documentation formats/templates you used

- Do you feel you are adequately prepared to document patient care effectively?
- Have you received in-service training on nursing documentation?

**Probes:** When and what kind of training you received if, Gaps in knowledge/skill

- What challenges do you face when trying to document patient care?

**Probes:** Workload/time pressure, Lack of resources or tools (e.g., forms, computers), Staff shortage or interruptions, Lack of institutional support

- How does the hospital administration support or hinder nursing documentation?

**Probes:** Supervision, Policies/guidelines, Peer influence, Monitoring or feedback systems

- How important do you think documentation is in your daily work?
- In your experience, what happens when documentation is missed/incomplete/delayed?

**Probes:** Role in patient care, Legal/professional implications

- How do you personally feel when you're doing documentation tasks?
- Do you consider documentation as part of patient care or a separate administrative task?
- Do you feel recognized or evaluated based on your documentation quality?

**Probes:** Enjoyable or burdensome?

- When the ward is very busy, how do you prioritize between patient care and documentation?

**Probes:** Do you delay documentation? Do you ever document retrospectively (after the care is given)? If so, how often?

- What kinds/parts of documentation do you think are most often missed or incomplete?

**Probes:** Medication administration, Patient assessments or vital signs, Patient education, Interventions or nursing decisions

- What do you think could be done to improve nursing documentation practices in your hospital?

**Probes:** Training needs, System/process improvements, Staffing or resource allocation?

- Is there anything else you’d like to add about nursing documentation in your daily work?

**Ending**

Each answer you give us is very important and valuable for the study findings. Finally, if you have anything you would like to add, please let us know. Thank you again for your time and participation in the interview and your answers.
